# Supplementary material
Source: Springer Nature journal article supplement (https://www.springermedizin.de/resource/supplementary/12984_2007_132_MOESM1_ESM.pdf/9605440)
Supplement: MOESM1 [file 9605440]

Potentially relevant studies identified from electronic databases  
(Medline, PsycINFO, Psyn dex, CINAHL, Cochrane, Scopus, PEDRO)  
N=2116 references

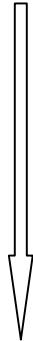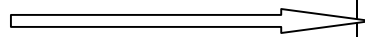

Studies excluded after  
title and abstract  
screening: n=2042

Studies retrieved for detailed evaluation:

- From electronic databases: n=74
- From hand searching (conference proceedings, reference lists of reviews and full text studies): n=39

**Total: n=113**

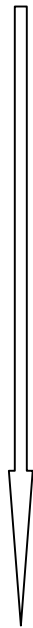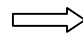

Studies excluded after full text assessment

Reasons for exclusion:

- No RCTs **n=58**
- The study population differs from the defined study population **n=26**
- MI is not used as an intervention **n=25**

Inclusion **n=4**

**Total exclusion: n=113**

Initial agreement on inclusion and exclusion: 96%

**All studies included in the review: n=4**

From electronic databases: n=3

From hand searching: n=1
